# Supplementary material for: Preclinical Evidence of Nanomedicine Formulation to Target Mycobacterium tuberculosis at Its Bone Marrow Niche
Source: MDPI journal article supplement (doi:10.3390/pathogens9050372), 2020-05-13
Supplement: s1 [file s1]

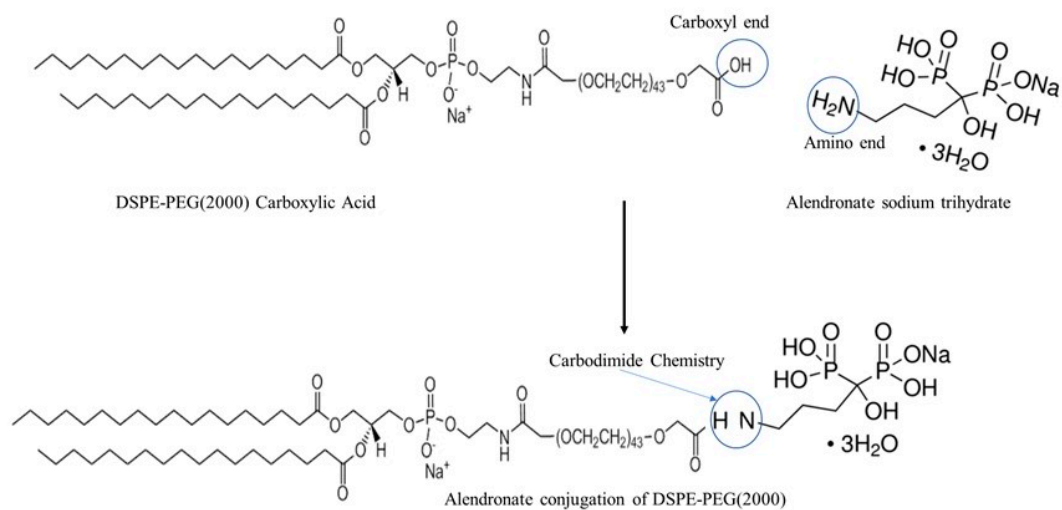

**Figure S1.** Schematic for synthesis of Alendronate conjugation of DSPE-PEG(2000) from DSPE-PEG(2000) Carboxylic Acid and alendronate sodium trihydrate.
